# Supplementary material for: Declining Radial Growth in Major Western Carpathian Tree Species: Insights from Three Decades of Temperate Forest Monitoring
Source: MDPI journal article supplement (doi:10.3390/plants12244081), 2023-12-06
Supplement: s1 [file s1]

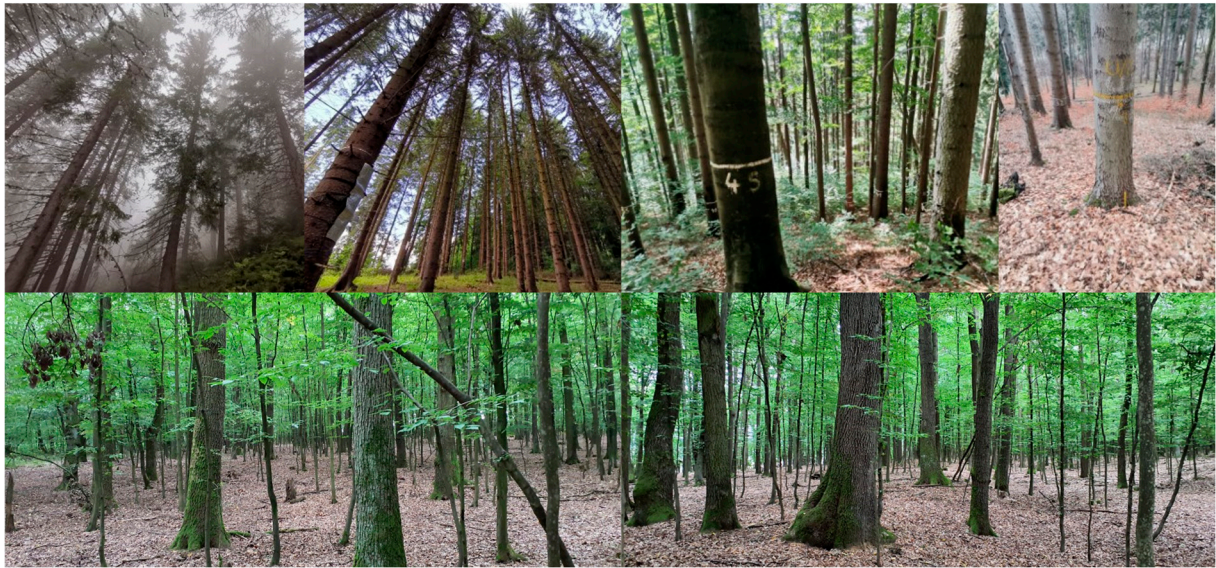

**Figure S1** Forest structures typical for Western Carpathians examined in the study, from mountain spruce forests (upper left corner) through mixed beech-fir dominated mountain forests (upper right corner) to sessile oak dominated foothills.

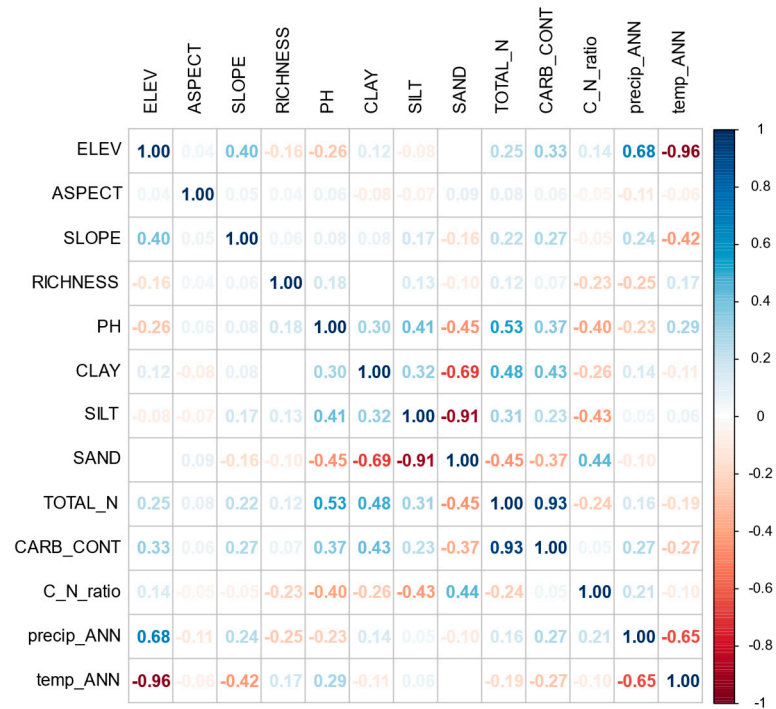

**Figure S2** Correlation matrix of environmental variables. Values represent Pearson correlation coefficient.
