# Supplementary material for: Declining Radial Growth in Major Western Carpathian Tree Species: Insights from Three Decades of Temperate Forest Monitoring
Source: MDPI journal article supplement (doi:10.3390/plants12244081), 2023-12-06
Supplement: s1 [file s1]

**Table S1** Basic site description of permanent monitoring plots (ICP Forests Level I) analysed in the study

| ICP-Forests<br>Level I plot | t0   | t_end | Elevation | Aspect | Slope | Precipit<br>mean ann<br>1950-2022 | Temp<br>mean ann<br>1950-2022 | Species and number of original trees | Tree<br>Species<br>richness | DBH<br>mean_t0 | DBH<br>mean<br>t_end | PH(H2O) | CLAY | SILT | SAND | TOTAL_N                | Corg                   | C/N  |
|-----------------------------|------|-------|-----------|--------|-------|-----------------------------------|-------------------------------|--------------------------------------|-----------------------------|----------------|----------------------|---------|------|------|------|------------------------|------------------------|------|
| [ID]                        | [yr] | [yr]  | [m asl]   | [deg]  | [%]   | [mm]                              | [°C]                          | [pcs]                                | [-]                         | [cm]           | [cm]                 | [-]     | [%]  | [%]  | [%]  | [ g.kg <sup>-1</sup> ] | [ g.kg <sup>-1</sup> ] | [-]  |
| A7                          | 1989 | 2023  | 169       | 316    | 0.6   | 516                               | 9.8                           | PS97                                 | 1                           | 24.1±4         | 32±4.3               | 4.7     | 5.5  | 1.1  | 93.4 | 0.5                    | 10.0                   | 20.0 |
| A8                          | 1989 | 2023  | 187       | 308    | 0.6   | 518                               | 9.7                           | PS65                                 | 1                           | 22.2±3.5       | 28.1±3.9             | 5.4     | 5.7  | 2.6  | 91.7 | 0.3                    | 8.3                    | 27.7 |
| B7                          | 1989 | 2023  | 210       | 5      | 0.0   | 555                               | 9.8                           | PS75                                 | 1                           | 22.2±4.6       | 29.4±6.3             | 4.2     | 5.8  | 4.9  | 89.3 | 0.7                    | 15.5                   | 22.1 |
| B8                          | 1989 | 2023  | 304       | 5      | 8.6   | 562                               | 9.1                           | FS56                                 | 2                           | 20±3.8         | 36.2±7.4             | 7.1     | 30.8 | 54.8 | 14.4 | 6.3                    | 85.7                   | 13.6 |
| C10                         | 1989 | 2023  | 121       | 190    | 0.3   | 523                               | 10.4                          | QP1                                  | 6                           | 17.2±6.9       | 24.7±9.5             | 7.4     | 16.8 | 57.5 | 25.7 | 4.8                    | 56.6                   | 13.4 |
| C7                          | 1989 | 2023  | 289       | 304    | 23.3  | 595                               | 9.2                           | FS78_QP2                             | 2                           | 21.7±8.4       | 35.5±8.4             | 7.7     | 31.5 | 67.2 | 1.2  | 8.8                    | 117.9                  | 11.8 |
| D13                         | 1989 | 2023  | 108       | 51     | 0.7   | 515                               | 10.7                          | QP2                                  | 3                           | 17±6.3         | 26.8±12.7            | 7.6     | 30.8 | 66.0 | 3.2  | 5.5                    | 57.0                   | 10.4 |
| E5                          | 1989 | 2023  | 322       | 267    | 21.6  | 734                               | 8.7                           | FS3_QP34                             | 5                           | 18.5±6.4       | 29.7±10.3            | 6.8     | 26.4 | 64.0 | 9.6  | 3.5                    | 46.6                   | 13.3 |
| E6                          | 1989 | 2023  | 289       | 233    | 23.0  | 681                               | 8.9                           | QP69                                 | 1                           | 18.5±3.8       | 27.5±4.5             | 5.6     | 18.2 | 76.6 | 5.2  | 3.0                    | 44.2                   | 14.7 |
| E7                          | 1989 | 2023  | 536       | 130    | 13.4  | 688                               | 8.3                           | FS35_PS2_QP1_PA13                    | 8                           | 25.9±8.2       | 38.5±10.9            | 6.8     | 23.9 | 73.9 | 2.2  | 9.6                    | 114.1                  | 11.9 |
| F12a                        | 2008 | 2023  | 111       | 340    | 0.5   | 521                               | 10.7                          | QP31                                 | 4                           | 18.8±4.1       | 23.7±4.9             | 4.8     | 6.7  | 11.0 | 82.3 | 3.1                    | 36.1                   | 11.6 |
| F4                          | 1989 | 2023  | 630       | 265    | 26.6  | 806                               | 6.5                           | FS54                                 | 2                           | 17.6±4.8       | 30.5±9               | 5.9     | 23.7 | 54.6 | 21.6 | 3.8                    | 51.6                   | 13.6 |
| F5                          | 1989 | 2023  | 431       | 316    | 13.1  | 769                               | 8.2                           | FS24_PS23                            | 8                           | 23±7.3         | 40±11.5              | 5.7     | 31.6 | 64.0 | 4.4  | 2.9                    | 35.3                   | 12.2 |
| F6                          | 1989 | 2023  | 254       | 48     | 4.3   | 666                               | 8.8                           | PS23_QP37                            | 5                           | 20.9±6.4       | 34±8.4               | 5.3     | 23.8 | 65.2 | 11.0 | 2.2                    | 34.0                   | 15.5 |
| F7                          | 1989 | 2023  | 264       | 264    | 4.4   | 604                               | 9.3                           | QP26                                 | 3                           | 15.1±4.3       | 26.3±7.8             | 4.5     | 15.2 | 76.2 | 8.6  | 2.2                    | 28.8                   | 13.1 |
| G3                          | 1989 | 2023  | 495       | 213    | 13.9  | 876                               | 7.1                           | PS71                                 | 1                           | 20.1±3.9       | 35.6±5.2             | 5.3     | 18.8 | 61.6 | 19.6 | 2.1                    | 27.8                   | 13.2 |
| G4                          | 1989 | 2023  | 325       | 180    | 11.6  | 805                               | 8.3                           | PS2_QP2_PA56                         | 4                           | 24.5±6.1       | 42.1±11.7            | 4.7     | 17.5 | 76.1 | 6.4  | 2.1                    | 35.6                   | 17.0 |
| G5                          | 1989 | 2023  | 625       | 335    | 14.5  | 882                               | 6.7                           | FS6_PS52                             | 2                           | 32.4±7         | 41.2±8.5             | 7.1     | 34.0 | 62.6 | 3.4  | 4.4                    | 64.9                   | 14.8 |
| G6                          | 1989 | 2023  | 450       | 109    | 14.8  | 758                               | 7.6                           | FS57_QP5                             | 2                           | 31.6±11.1      | 49.8±7.6             | 4.7     | 13.2 | 50.2 | 36.6 | 1.4                    | 23.9                   | 17.1 |
| G8                          | 1989 | 2023  | 490       | 9      | 15.6  | 649                               | 7.8                           | FS61                                 | 1                           | 15±4.5         | 25.2±8.3             | 4.5     | 5.2  | 43.9 | 51.0 | 3.0                    | 47.7                   | 15.9 |
| H1                          | 1989 | 2023  | 915       | 209    | 15.7  | 1111                              | 4.8                           | FS2_PA79                             | 2                           | 25.1±5.9       | 41.8±7.5             | 4.3     | 12.7 | 26.5 | 60.8 | 4.1                    | 87.9                   | 21.4 |
| H2                          | 1989 | 2007  | 585       | 16     | 14.3  | 1085                              | 7.0                           | AA1_PA49                             | 2                           | 41.6±6.6       | 48.6±6               | 4.2     | 19.7 | 52.0 | 28.3 | 2.3                    | 42.5                   | 18.5 |
| H2a                         | 2008 | 2020  | 585       | 16     | 14.3  | 1085                              | 7.0                           | PA50                                 | 1                           | 39.1±4.6       | 43.3±5.5             | 4.2     | 19.7 | 52.0 | 28.3 | 2.3                    | 42.5                   | 18.5 |
| H3                          | 1989 | 2023  | 476       | 307    | 18.2  | 908                               | 7.4                           | FS69                                 | 1                           | 30.7±5.8       | 40.7±7.2             | 6.6     | 31.1 | 55.7 | 13.2 | 3.7                    | 46.7                   | 12.6 |
| H4                          | 1989 | 2023  | 499       | 132    | 20.8  | 914                               | 7.2                           | FS1_PS34_PA37                        | 3                           | 24.7±8.1       | 30.3±8.6             | 6.8     | 26.6 | 70.7 | 2.7  | 4.5                    | 85.4                   | 19.0 |
| H5                          | 1989 | 2023  | 759       | 145    | 35.1  | 882                               | 5.5                           | FS15_PA1                             | 3                           | 24±5.9         | 34.6±7.4             | 5.0     | 40.8 | 54.3 | 4.8  | 4.0                    | 63.9                   | 16.0 |
| H7                          | 1989 | 2023  | 932       | 335    | 10.3  | 858                               | 5.5                           | FS59                                 | 2                           | 28.4±13.6      | 38.6±17              | 4.3     | 28.4 | 49.5 | 22.1 | 8.3                    | 100.3                  | 12.1 |
| H8                          | 1989 | 2023  | 604       | 276    | 20.2  | 732                               | 7.1                           | FS51_QP1                             | 2                           | 22.1±6.8       | 30.2±9.2             | 4.9     | 15.2 | 59.4 | 25.3 | 2.5                    | 50.0                   | 20.0 |
| H9                          | 1989 | 2023  | 248       | 273    | 27.3  | 664                               | 9.6                           | FS43_QP1                             | 5                           | 15.8±4.5       | 27.6±9.4             | 5.8     | 7.3  | 46.9 | 45.7 | 3.2                    | 48.6                   | 15.2 |
| I10                         | 1989 | 2023  | 237       | 174    | 9.4   | 555                               | 9.8                           | QP17                                 | 4                           | 20.2±5.8       | 38.6±7.7             | 5.4     | 39.2 | 58.3 | 2.5  | 4.1                    | 55.2                   | 13.5 |
| I2                          | 1989 | 2020  | 461       | 21     | 24.9  | 1009                              | 7.4                           | PA58                                 | 1                           | 30.5±8.2       | 38.6±13.6            | 4.0     | 12.8 | 46.6 | 40.6 | 1.6                    | 24.5                   | 15.3 |
| I4                          | 1989 | 2023  | 804       | 168    | 29.4  | 971                               | 4.7                           | FS8_AA4_PA51                         | 4                           | 29.1±6.1       | 41±9.2               | 4.4     | 16.8 | 40.2 | 43.0 | 3.0                    | 49.6                   | 16.5 |
| I8                          | 1989 | 2023  | 514       | 244    | 24.3  | 683                               | 7.3                           | FS54_AP1                             | 3                           | 17.3±5.4       | 26.8±8.8             | 6.9     | 34.3 | 53.7 | 12.0 | 4.8                    | 65.4                   | 13.6 |
| I9                          | 1989 | 2023  | 575       | 350    | 5.8   | 688                               | 7.2                           | FS6_QP40                             | 3                           | 16.5±5.5       | 26.1±9.3             | 4.8     | 13.5 | 66.6 | 19.9 | 2.2                    | 28.7                   | 13.0 |
| J10                         | 1989 | 2023  | 202       | 324    | 9.7   | 566                               | 9.8                           | FS9_QP7                              | 6                           | 21.4±5.8       | 33.1±8.8             | 5.4     | 10.7 | 65.5 | 23.8 | 1.7                    | 24.3                   | 14.3 |

Notes

AA *Abies alba*  
FS *Fagus sylvatica*  
PA *Picea abies*  
PS *Pinus sylvestris*  
QP *Quercus petraea*

| ICP-Forests<br>Level I plot | t0   | t_end | Elevation | Aspect | Slope | Precipit<br>mean ann<br>1950-2022 | Temp<br>mean ann<br>1950-2022 | Species and number of original trees | Tree<br>Species<br>richness | DBH<br>mean_t0 | DBH<br>mean<br>t_end | PH(H2O) | CLAY | SILT | SAND | TOTAL_N                | Corg                   | C/N  |
|-----------------------------|------|-------|-----------|--------|-------|-----------------------------------|-------------------------------|--------------------------------------|-----------------------------|----------------|----------------------|---------|------|------|------|------------------------|------------------------|------|
| [ID]                        | [yr] | [yr]  | [m asl]   | [deg]  | [%]   | [mm]                              | [°C]                          | [pcs]                                | [-]                         | [cm]           | [cm]                 | [-]     | [%]  | [%]  | [%]  | [ g.kg <sup>-1</sup> ] | [ g.kg <sup>-1</sup> ] | [-]  |
| J2                          | 1989 | 2016  | 668       | 331    | 23.9  | 1135                              | 6.3                           | PA53                                 | 1                           | 29.3±7.6       | 38.5±9.5             | 4.2     | 24.2 | 51.5 | 24.3 | 2.2                    | 32.1                   | 14.6 |
| J3                          | 1989 | 2023  | 817       | 218    | 36.7  | 1082                              | 5.3                           | FS29_PA45                            | 3                           | 25.1±6         | 35.4±6.7             | 6.6     | 32.0 | 57.0 | 11.1 | 5.7                    | 75.9                   | 13.3 |
| J4                          | 1989 | 2023  | 573       | 2      | 27.5  | 1052                              | 7.3                           | FS29_AA2_PA42                        | 5                           | 23.1±8.9       | 36.7±12.4            | 6.1     | 37.6 | 60.1 | 2.3  | 3.2                    | 41.4                   | 12.9 |
| J5                          | 1989 | 2014  | 1012      | 208    | 26.5  | 1047                              | 3.9                           | FS4_PA48                             | 3                           | 31.5±8.7       | 45.1±14              | 5.8     | 39.4 | 57.4 | 3.3  | 5.4                    | 72.1                   | 13.4 |
| J6                          | 1989 | 2023  | 720       | 21     | 28.7  | 1055                              | 6.4                           | FS51_AA3_PA14                        | 3                           | 27.3±11.3      | 36.8±10.9            | 7.0     | 23.9 | 70.0 | 6.1  | 7.3                    | 100.6                  | 13.8 |
| J7                          | 1989 | 1996  | 586       | 66     | 21.7  | 793                               | 7.3                           | FS50                                 | 1                           | 35.3±11.4      | 36.8±12.1            | 5.8     | 9.9  | 68.7 | 21.3 | 2.0                    | 26.8                   | 13.4 |
| J7a                         | 1997 | 2016  | 586       | 66     | 21.7  | 793                               | 7.3                           | FS50                                 | 1                           | 29.4±4.9       | 34.6±4.2             | 5.8     | 9.9  | 68.7 | 21.3 | 2.0                    | 26.8                   | 13.4 |
| J7b                         | 2017 | 2023  | 635       | 113    | 5.9   | 781                               | 6.9                           | FS50                                 | 1                           | 16.9±3.7       | 18.8±4.5             | 5.8     | 9.9  | 68.7 | 21.3 | 2.0                    | 26.8                   | 13.4 |
| J8                          | 1989 | 2023  | 450       | 315    | 7.8   | 689                               | 8.0                           | QP33_                                | 2                           | 16.8±3.2       | 25.8±6.5             | 5.2     | 14.2 | 48.5 | 37.3 | 2.1                    | 32.3                   | 15.4 |
| K1                          | 1989 | 2023  | 847       | 265    | 11.5  | 1158                              | 5.1                           | PA79                                 | 1                           | 29.4±7.9       | 42.5±9.7             | 3.6     | 28.3 | 46.0 | 25.7 | 7.5                    | 155.2                  | 20.7 |
| K10                         | 1989 | 2023  | 436       | 116    | 24.3  | 536                               | 7.9                           | QP67                                 | 3                           | 20.5±6.7       | 29.9±6.5             | 5.7     | 17.0 | 38.0 | 45.0 | 1.4                    | 19.3                   | 13.8 |
| K2                          | 1989 | 2023  | 862       | 331    | 8.1   | 971                               | 4.3                           | PA71                                 | 1                           | 28.6±6.6       | 38.8±7               | 4.0     | 44.0 | 54.8 | 1.2  | 2.6                    | 40.6                   | 15.6 |
| K4                          | 1989 | 2023  | 569       | 303    | 14.5  | 1004                              | 7.1                           | PS4_PA83                             | 2                           | 21.7±5.7       | 39.1±5.1             | 5.2     | 34.2 | 63.2 | 2.6  | 4.5                    | 72.4                   | 16.1 |
| K5                          | 1989 | 2002  | 662       | 307    | 34.6  | 1056                              | 6.5                           | PA57                                 | 1                           | 28.7±5.6       | 31.8±7.3             | 7.1     | 21.9 | 75.0 | 3.1  | 9.9                    | 142.2                  | 14.4 |
| K5a                         | 2003 | 2023  | 662       | 307    | 34.6  | 1056                              | 6.5                           | FS12_PA45                            | 3                           | 29.2±6.9       | 33.9±8               | 7.1     | 21.9 | 75.0 | 3.1  | 9.9                    | 142.2                  | 14.4 |
| K6                          | 1989 | 2001  | 555       | 161    | 15.8  | 849                               | 6.6                           | PS31_PA20                            | 3                           | 31.5±10.5      | 35.3±9.6             | 6.9     | 18.3 | 65.5 | 16.2 | 7.4                    | 111.3                  | 15.0 |
| K6a                         | 2003 | 2023  | 555       | 161    | 15.8  | 849                               | 6.6                           | PS48_PA5                             | 3                           | 25.6±7.5       | 33.8±7.1             | 6.9     | 18.3 | 65.5 | 16.2 | 7.4                    | 111.3                  | 15.0 |
| L10                         | 1989 | 2005  | 259       | 181    | 7.7   | 548                               | 8.9                           | QP54                                 | 1                           | 17.2±4         | 20.3±4.3             | 5.0     | 24.9 | 45.1 | 30.0 | 2.4                    | 36.5                   | 15.2 |
| L2                          | 1989 | 2023  | 1037      | 159    | 15.6  | 1021                              | 4.1                           | AA1_PA77                             | 2                           | 29.9±6.1       | 35.7±6.3             | 4.1     | 15.7 | 51.7 | 32.6 | 2.2                    | 33.7                   | 15.3 |
| L3                          | 1989 | 2016  | 900       | 74     | 20.2  | 966                               | 4.7                           | PS1_PA60                             | 2                           | 33.8±8         | 44.5±8.2             | 4.0     | 20.1 | 61.6 | 18.3 | 2.7                    | 44.8                   | 16.6 |
| L5                          | 1989 | 2023  | 1167      | 181    | 17.5  | 1022                              | 2.6                           | FS3_PA71                             | 3                           | 23.7±6.6       | 39.6±8.2             | 4.4     | 7.7  | 31.2 | 61.1 | 3.5                    | 40.3                   | 11.5 |
| L6                          | 1989 | 2023  | 855       | 325    | 25.9  | 903                               | 5.3                           | FS55_PA5                             | 2                           | 15.6±4         | 27.2±8.1             | 5.0     | 9.4  | 56.5 | 34.2 | 3.6                    | 50.2                   | 13.9 |
| L7                          | 1989 | 2023  | 1256      | 346    | 11.8  | 790                               | 2.4                           | PA46                                 | 1                           | 49.7±16.1      | 65.2±11.6            | 4.8     | 35.5 | 37.9 | 26.6 | 6.3                    | 72.3                   | 11.5 |
| L8                          | 1989 | 2023  | 505       | 166    | 20.9  | 688                               | 7.5                           | FS54                                 | 1                           | 29.2±10.4      | 41±13.5              | 4.6     | 9.6  | 47.4 | 43.1 | 1.3                    | 23.5                   | 18.1 |
| L9                          | 1989 | 2023  | 372       | 253    | 17.7  | 564                               | 8.1                           | QP7_                                 | 3                           | 16.9±5.2       | 24.3±7.7             | 5.3     | 16.8 | 72.1 | 11.1 | 2.0                    | 27.5                   | 13.8 |
| M2                          | 1989 | 2015  | 794       | 20     | 19.7  | 1073                              | 5.2                           | PA53                                 | 1                           | 30.5±7.1       | 42.4±10.6            | 4.5     | 19.8 | 31.6 | 48.7 | 3.1                    | 58.5                   | 18.9 |
| M5                          | 1989 | 2013  | 1310      | 32     | 28.3  | 1041                              | 2.0                           | PA56                                 | 1                           | 32±8.8         | 36.2±9.7             | 4.2     | 11.0 | 32.9 | 56.1 | 1.7                    | 25.9                   | 15.2 |
| M7                          | 1989 | 2023  | 627       | 21     | 21.9  | 820                               | 7.0                           | FS22_AA30_PA12                       | 3                           | 36.8±11.5      | 51.2±14.1            | 4.0     | 20.3 | 39.1 | 40.6 | 3.6                    | 57.5                   | 16.0 |
| M8                          | 1989 | 2023  | 312       | 260    | 16.3  | 651                               | 8.7                           | FS11_QP18                            | 5                           | 28.1±9.5       | 40.2±13              | 4.5     | 10.8 | 51.8 | 37.5 | 1.5                    | 19.9                   | 13.3 |
| M9                          | 1989 | 2023  | 230       | 145    | 15.4  | 550                               | 9.3                           | QP28_AP41                            | 4                           | 22.6±7         | 35.8±8.9             | 5.0     | 32.8 | 60.1 | 7.2  | 2.9                    | 31.7                   | 10.9 |
| N10                         | 1989 | 2017  | 323       | 263    | 14.4  | 541                               | 8.7                           | FS1_QP39                             | 3                           | 24.3±8         | 32.8±10.1            | 4.7     | 15.7 | 45.5 | 38.8 | 1.3                    | 20.5                   | 15.8 |
| N10a                        | 2022 | 2023  | 377       | 314    | 22.8  | 541                               | 8.4                           | FS23_QP27                            | 2                           | 39.9±7.8       | 40.3±7.9             | 4.7     | 15.7 | 45.5 | 38.8 | 1.3                    | 20.5                   | 15.8 |
| N3                          | 1989 | 2013  | 1123      | 143    | 9.5   | 1456                              | 2.7                           | PA58                                 | 1                           | 46.2±12.2      | 47.4±12.7            | 4.0     | 10.1 | 36.2 | 53.8 | 2.1                    | 29.7                   | 14.1 |
| N4                          | 1989 | 2023  | 779       | 61     | 10.4  | 1302                              | 6.1                           | PS2_PA55                             | 2                           | 32.3±5.8       | 41.2±7.5             | 5.1     | 12.0 | 58.2 | 29.8 | 1.0                    | 17.8                   | 17.8 |
| N5                          | 1989 | 2023  | 1009      | 337    | 22.1  | 1088                              | 4.6                           | PA80                                 | 1                           | 23.4±5.7       | 35.7±7.8             | 4.5     | 16.6 | 41.8 | 41.6 | 4.3                    | 73.5                   | 17.1 |
| N6                          | 1989 | 2023  | 928       | 100    | 12.1  | 878                               | 4.6                           | FS13_AA12_PA71                       | 3                           | 28.5±8.7       | 37.5±10.6            | 5.0     | 28.1 | 69.9 | 2.1  | 4.7                    | 77.2                   | 16.4 |
| N8                          | 1989 | 2023  | 296       | 54     | 15.1  | 593                               | 8.9                           | FS39_PS19_PA3                        | 5                           | 19.1±8.8       | 27.1±8.5             | 5.4     | 11.6 | 58.1 | 30.4 | 1.7                    | 29.6                   | 17.4 |
| O4                          | 1989 | 2023  | 790       | 141    | 1.3   | 1565                              | 7.8                           | PS10_PA51                            | 2                           | 34.5±10.6      | 42±9.6               | 4.0     | 20.5 | 51.1 | 28.3 | 2.5                    | 56.6                   | 22.6 |
| O5                          | 1989 | 2023  | 1093      | 287    | 31.6  | 1033                              | 3.5                           | PS1_PA75                             | 4                           | 30.7±7.2       | 36.9±8.7             | 6.1     | 15.5 | 78.9 | 5.6  | 6.8                    | 104.8                  | 15.4 |

|                             |      |       |           |        |       |                                   |                               |                                      |                             |                |                      |         |      |      |      |                       |                       |      |
|-----------------------------|------|-------|-----------|--------|-------|-----------------------------------|-------------------------------|--------------------------------------|-----------------------------|----------------|----------------------|---------|------|------|------|-----------------------|-----------------------|------|
| O6                          | 1989 | 2015  | 891       | 315    | 22.0  | 919                               | 5.1                           | FS11_PA53                            | 2                           | 34.9±12.8      | 48.2±5.2             | 4.5     | 10.5 | 44.6 | 45.0 | 2.3                   | 45.7                  | 19.9 |
| O6a                         | 2022 | 2023  | 938       | 313    | 19.4  | 921                               | 4.8                           | FS42_PA7                             | 3                           | 22±6           | 22.6±6.1             | 4.5     | 10.5 | 44.6 | 45.0 | 2.3                   | 45.7                  | 19.9 |
| O7                          | 1989 | 2016  | 587       | 332    | 26.7  | 595                               | 6.8                           | FS48                                 | 5                           | 26.8±10.6      | 39.1±13.5            | 5.9     | 9.9  | 51.9 | 38.2 | 2.0                   | 24.6                  | 12.3 |
| ICP-Forests<br>Level I plot | t0   | t_end | Elevation | Aspect | Slope | Precipit<br>mean ann<br>1950-2022 | Temp<br>mean ann<br>1950-2022 | Species and number of original trees | Tree<br>Species<br>richness | DBH<br>mean_t0 | DBH<br>mean<br>t_end | PH(H2O) | CLAY | SILT | SAND | TOTAL_N               | Corg                  | C/N  |
| [ID]                        | [yr] | [yr]  | [m asl]   | [deg]  | [%]   | [mm]                              | [°C]                          | [pcs]                                | [-]                         | [cm]           | [cm]                 | [-]     | [%]  | [%]  | [%]  | [g.kg <sup>-1</sup> ] | [g.kg <sup>-1</sup> ] | [-]  |
| O7a                         | 2017 | 2023  | 557       | 348    | 19.9  | 596                               | 7.0                           | FS6_QP42                             | 3                           | 33±8.4         | 35±9                 | 5.9     | 9.9  | 51.9 | 38.2 | 2.0                   | 24.6                  | 12.3 |
| P2                          | 1989 | 2023  | 611       | 144    | 23.9  | 790                               | 6.5                           | AA2_PA44                             | 6                           | 21.3±8.3       | 38.8±18.8            | 5.0     | 20.5 | 73.2 | 6.3  | 4.2                   | 50.2                  | 12.0 |
| P3                          | 1989 | 2002  | 754       | 41     | 1.4   | 953                               | 5.7                           | PS7_PA56                             | 2                           | 32.2±7.7       | 32.6±5.8             | 5.0     | 34.4 | 47.6 | 18.0 | 5.9                   | 86.1                  | 14.6 |
| P5                          | 1989 | 2023  | 654       | 307    | 17.2  | 742                               | 6.0                           | FS2_PS3_AA13_PA39                    | 5                           | 21.6±5.6       | 27.5±8.6             | 7.2     | 20.0 | 77.3 | 2.7  | 10.8                  | 151.1                 | 14.0 |
| P6                          | 1989 | 2007  | 635       | 366    | 20.2  | 670                               | 5.9                           | FS30_PA1                             | 5                           | 20.6±7.2       | 27.2±10.7            | 4.7     | 8.4  | 37.1 | 54.5 | 2.3                   | 39.9                  | 17.3 |
| P6a                         | 2011 | 2023  | 643       | 358    | 19.5  | 670                               | 5.9                           | FS57_PA3                             | 2                           | 37.3±7.2       | 38.9±7.2             | 4.7     | 8.4  | 37.1 | 54.5 | 2.3                   | 39.9                  | 17.3 |
| R2                          | 1989 | 2023  | 709       | 350    | 15.8  | 851                               | 6.5                           | PA65                                 | 1                           | 20.8±4.6       | 30±8                 | 4.5     | 32.5 | 62.2 | 5.3  | 5.1                   | 70.7                  | 13.9 |
| R4                          | 1989 | 2023  | 714       | 259    | 4.6   | 799                               | 5.7                           | PS1_AA34_PA31                        | 5                           | 28±6.4         | 45.9±11.3            | 5.6     | 27.3 | 44.2 | 28.5 | 3.9                   | 52.8                  | 13.5 |
| R5                          | 1989 | 2023  | 507       | 21     | 18.7  | 725                               | 7.6                           | PA72                                 | 1                           | 23.7±5.7       | 35.2±6.1             | 4.3     | 14.3 | 56.1 | 29.5 | 2.2                   | 38.5                  | 17.5 |
| R6                          | 1989 | 2002  | 802       | 163    | 23.3  | 808                               | 5.7                           | FS10_AA2_PA53                        | 3                           | 32.2±9.4       | 38.7±8.9             | 4.1     | 21.1 | 59.4 | 19.4 | 5.0                   | 92.1                  | 18.4 |
| R6a                         | 2003 | 2023  | 811       | 175    | 26.3  | 808                               | 5.7                           | FS22_AA3_PA25                        | 4                           | 35.4±12.2      | 42.7±13.5            | 4.1     | 21.1 | 59.4 | 19.4 | 5.0                   | 92.1                  | 18.4 |
| S2                          | 1989 | 2023  | 479       | 149    | 12.8  | 826                               | 7.7                           | FS35_PA3                             | 3                           | 22.9±6.4       | 31.9±10.2            | 5.0     | 15.1 | 49.2 | 35.8 | 4.7                   | 63.5                  | 13.5 |
| S4                          | 1989 | 2023  | 791       | 263    | 15.4  | 816                               | 5.7                           | PA63                                 | 4                           | 24.8±6.9       | 34.5±7.3             | 4.5     | 13.1 | 41.1 | 45.8 | 1.3                   | 20.5                  | 15.8 |
| S5                          | 1989 | 2023  | 493       | 203    | 5.8   | 751                               | 7.6                           | PS27_PA42                            | 2                           | 29.4±6.1       | 39.5±8.4             | 6.2     | 22.6 | 53.6 | 23.8 | 4.3                   | 72.5                  | 16.9 |
| S6                          | 1989 | 2023  | 505       | 112    | 23.6  | 767                               | 7.6                           | FS46_PS1_PA5                         | 4                           | 25.2±5.9       | 36±8.2               | 4.2     | 32.6 | 46.9 | 20.5 | 6.7                   | 106.1                 | 15.8 |
| S7                          | 1989 | 2023  | 737       | 3      | 20.9  | 587                               | 5.4                           | FS34_AA31_PA1                        | 3                           | 33.9±7.2       | 43.2±7.7             | 5.8     | 33.0 | 61.8 | 5.2  | 2.8                   | 40.6                  | 14.5 |
| T3                          | 1989 | 1997  | 732       | 356    | 18.9  | 806                               | 5.9                           | AA25                                 | 1                           | 33.2±9.6       | 36.7±11.4            | 5.0     | 13.6 | 50.9 | 35.5 | 2.9                   | 43.3                  | 14.9 |
| T3_2                        | 2002 | 2023  | 732       | 356    | 18.9  | 806                               | 5.9                           | FS11_AA54_PA3                        | 5                           | 37.8±14        | 37.2±13.2            | 5.0     | 13.6 | 50.9 | 35.5 | 2.9                   | 43.3                  | 14.9 |
| T4                          | 1989 | 2023  | 580       | 106    | 16.1  | 765                               | 7.0                           | AA65                                 | 6                           | 31.4±9.7       | 45.7±12.2            | 4.8     | 11.3 | 42.3 | 46.4 | 2.3                   | 32.5                  | 14.1 |
| T5                          | 1989 | 2023  | 750       | 232    | 30.7  | 738                               | 5.8                           | FS32_QP8_C                           | 5                           | 31.9±9.3       | 42.4±11              | 5.3     | 11.7 | 47.2 | 41.1 | 4.0                   | 52.3                  | 13.1 |
| T6                          | 1989 | 2023  | 884       | 330    | 30.4  | 756                               | 5.1                           | FS40_AA4                             | 4                           | 41.3±10.8      | 49.4±11.9            | 4.4     | 14.2 | 55.1 | 30.7 | 4.0                   | 59.4                  | 14.9 |
| U2                          | 1989 | 2023  | 455       | 324    | 11.3  | 764                               | 7.0                           | FS14_PS1_QP1_AA33_PA6                | 7                           | 27.7±8.6       | 45.2±14              | 5.0     | 13.3 | 41.4 | 45.3 | 2.9                   | 41.1                  | 14.2 |
| U3                          | 1989 | 2023  | 512       | 124    | 14.6  | 792                               | 7.0                           | FS28_AA43_PA4                        | 6                           | 32.4±8.5       | 41.8±11.9            | 4.6     | 14.4 | 50.3 | 35.3 | 2.5                   | 38.4                  | 15.4 |
| U4                          | 1989 | 2023  | 371       | 14     | 6.9   | 812                               | 9.1                           | QP15                                 | 4                           | 25.7±5.9       | 34.9±9.3             | 5.5     | 11.2 | 41.4 | 47.5 | 2.6                   | 32.7                  | 12.6 |
| U5                          | 1989 | 2023  | 367       | 250    | 11.3  | 664                               | 7.9                           | FS5_QP2                              | 4                           | 34.4±11.6      | 39.8±9.9             | 5.3     | 12.0 | 51.8 | 36.1 | 1.9                   | 23.9                  | 12.6 |
| U6                          | 1989 | 2023  | 383       | 322    | 10.6  | 711                               | 8.7                           | PS64                                 | 1                           | 32.2±5.4       | 35.7±6.8             | 7.6     | 25.3 | 70.6 | 4.0  | 6.8                   | 25.0                  | 3.7  |
| U7                          | 1989 | 2023  | 217       | 188    | 0.1   | 594                               | 9.2                           | QP55                                 | 1                           | 40.6±6.8       | 52±8.7               | 6.4     | 27.4 | 66.2 | 6.5  | 4.9                   | 72.4                  | 14.8 |
| V2                          | 1989 | 2023  | 391       | 5      | 13.8  | 753                               | 7.6                           | FS50                                 | 6                           | 31.4±13.3      | 53.7±17.7            | 4.5     | 20.1 | 72.2 | 7.7  | 2.9                   | 31.8                  | 11.0 |
| V3                          | 1989 | 2023  | 288       | 32     | 12.6  | 699                               | 8.1                           | FS47                                 | 3                           | 17.9±5.3       | 33.4±8.6             | 4.6     | 10.9 | 79.1 | 10.0 | 1.6                   | 24.9                  | 15.6 |
| V4                          | 1989 | 2023  | 331       | 48     | 12.3  | 710                               | 8.2                           | FS54_QP4                             | 2                           | 34.5±7.7       | 44.8±10.1            | 5.4     | 13.5 | 70.1 | 16.4 | 3.0                   | 30.3                  | 10.1 |
| V5                          | 1989 | 2019  | 749       | 75     | 12.2  | 819                               | 6.2                           | FS67                                 | 2                           | 37.1±6.6       | 42.7±3.4             | 4.7     | 30.3 | 49.4 | 20.3 | 5.2                   | 66.4                  | 12.8 |
| V7                          | 1989 | 2023  | 417       | 225    | 10.6  | 678                               | 8.3                           | FS68_QP1                             | 2                           | 32.6±6.7       | 42.7±10.8            | 5.0     | 11.7 | 80.4 | 7.8  | 2.4                   | 33.7                  | 14.0 |
| W6                          | 1999 | 2023  | 634       | 246    | 10.8  | 875                               | 6.7                           | FS64                                 | 2                           | 36.9±9         | 45.8±10.2            | 5.2     | 16.1 | 74.5 | 9.4  | 1.5                   | 30.4                  | 20.3 |
| X3                          | 1989 | 2023  | 341       | 59     | 24.4  | 812                               | 7.8                           | FS48                                 | 2                           | 20.5±5.3       | 34.2±12.3            | 5.1     | 27.6 | 64.1 | 8.3  | 1.7                   | 19.4                  | 11.4 |
| X4                          | 1989 | 2015  | 385       | 320    | 12.0  | 916                               | 6.7                           | FS58                                 | 1                           | 43.8±10        | 54.5±9.3             | 4.8     | 12.2 | 58.3 | 29.5 | 1.2                   | 15.1                  | 12.6 |
| Y3                          | 1989 | 2022  | 551       | 273    | 12.1  | 916                               | 6.7                           | FS52                                 | 2                           | 14.3±3.8       | 28.7±9.5             | 5.1     | 20.7 | 71.2 | 8.1  | 2.6                   | 33.9                  | 13.0 |
| Y4                          | 1989 | 2015  | 295       | 303    | 12.2  | 829                               | 8.1                           | FS50                                 | 2                           | 35.5±6.6       | 48.4±6.8             | 4.8     | 17.4 | 78.0 | 4.6  | 1.2                   | 13.7                  | 11.4 |

|     |      |      |     |     |      |     |     |               |   |           |           |     |      |      |      |     |      |      |
|-----|------|------|-----|-----|------|-----|-----|---------------|---|-----------|-----------|-----|------|------|------|-----|------|------|
| Y4a | 2023 | 2023 | 325 | 261 | 10.8 | 835 | 7.9 | FS34          | 2 | 24.8±6.5  | 24.8±6.5  | 4.8 | 17.4 | 78.0 | 4.6  | 1.2 | 13.7 | 11.4 |
| Z2  | 1989 | 2023 | 387 | 17  | 13.4 | 781 | 7.3 | FS54          | 1 | 29.7±12.6 | 39.1±17.6 | 5.1 | 28.5 | 66.5 | 5.0  | 1.5 | 18.7 | 12.5 |
| Z3  | 1989 | 2023 | 250 | 305 | 7.3  | 741 | 8.4 | QP7           | 4 | 33.9±8.7  | 45.7±11.7 | 4.4 | 12.3 | 40.4 | 47.3 | 2.1 | 27.9 | 13.3 |
| Z4  | 1989 | 2020 | 221 | 311 | 18.7 | 705 | 8.6 | FS50          | 1 | 32.6±8.3  | 42.4±7.3  | 4.4 | 12.0 | 40.7 | 47.3 | 1.8 | 31.3 | 17.4 |
| Z4a | 2023 | 2023 | 233 | 294 | 22.7 | 705 | 8.5 | FS35_PS1_QP14 | 3 | 25.7±6.8  | 25.9±6.8  | 4.4 | 12.0 | 40.7 | 47.3 | 1.8 | 31.3 | 17.4 |
